# Supplementary material for: Evaluation of DNA methylation levels of SEPT9 and SHOX2 in plasma of patients with head and neck squamous cell carcinoma using droplet digital PCR
Source: PubMed Central journal article supplement — Oncol Rep. 2024 Jan 31;51(3):52. doi: 10.3892/or.2024.8711 (PMC10865173; doi:10.3892/or.2024.8711), 2024-01-31
Supplement: Supplementary_Data2.pdf [file Supplementary_Data2.pdf]

Table SI. Sequence of primers and probes used for methylation-specific droplet digital PCR assays to detect the DNA methylation levels of *SEPT9* and *SHOX2*.

| DNA methylation specific assay for <i>SEPT9</i> or <i>SHOX2</i> | Primer sequence (5'→3')                                                                                        | Amplicon length |
|-----------------------------------------------------------------|----------------------------------------------------------------------------------------------------------------|-----------------|
| SEPT9-M                                                         | F: TTTTAGGACGTATAGTTTTATTTGGGAAA<br>R: CGCGACTATCCACTCAATCGAAAA<br>Probe: FAM-CGACCTCCCTATCCCGTTACCGAATCCAA    | 139 bp          |
| SEPT9-U                                                         | F: TTTTAGGATGTATAGTTTTATTTGGGAAA<br>R: AAACACAACCTATCCACTCAATCAAA<br>Probe: HEX-ACAACCTCCCTATCCCATTACCAAATCCAA | 142 bp          |
| SHOX2-M                                                         | F: AAGGGTTCGTCGTTTAAGTC<br>R: AATCGAATCTACGTTTCCAC<br>Probe: FAM-TTTCGGTGGCGGGCGAAAGT                          | 124 bp          |
| ACTB                                                            | F: AGGAGGTTTAGTAAGTTTTTTGGAT<br>R: CAATAAAACCTACTCCTCCCTTAAAAA<br>Probe: HEX-ACCACCACCCAACACACAATAACAAACA      | 129 bp          |

*SEPT9*, septin 9; *SHOX2*, short stature homeobox 2; M, methylated; U, unmethylated; ACTB, actin beta; F, forward; R, reverse.
